# Supplementary material for: Self-reported interoceptive accuracy and interoceptive attention differentially correspond to measures of visual attention and self-regard
Source: PeerJ. 2023 May 9;11:e15348. doi: 10.7717/peerj.15348 (PMC10355190; doi:10.7717/peerj.15348)
Supplement: Supplemental Information 1 [file peerj-11-15348-s001.docx]

| Appendix A: Full correlation matrix for all variables | | | | | | | | | | | | | | | | |
| --- | --- | --- | --- | --- | --- | --- | --- | --- | --- | --- | --- | --- | --- | --- | --- | --- |
|  | Scale | M (SD) | 1 | 2 | 3 | 4 | 5 | 6 | 7 | 8 | 9 | 10 | 11 | 12 | 13 | 14 |
| 1 | IAS | 84.46 (10.94) | — |  |  |  |  |  |  |  |  |  |  |  |  |  |
| 2 | MAIA | 3.19 (0.81) | .539*** | — |  |  |  |  |  |  |  |  |  |  |  |  |
| 3 | MAIA-ga | 3.29 (0.65) | .506*** | .698*** | — |  |  |  |  |  |  |  |  |  |  |  |
| 4 | RSES | 19.96 (2.17) | .266** | .068 | .161 | — |  |  |  |  |  |  |  |  |  |  |
| 5 | FSISb | 4.61 (1.38) | .262** | .094 | .438*** | .224* | — |  |  |  |  |  |  |  |  |  |
| 6 | SWLS | 21.30 (7.51) | .316** | .108 | .331*** | .161 | .524*** | — |  |  |  |  |  |  |  |  |
| 7 | DASS-D | 13.96 (6.2) | -.206* | -.191 | -.242* | -.299** | -.434*** | -.123 | — |  |  |  |  |  |  |  |
| 8 | DASS-A | 13.74 (6.15) | -.219* | -.167 | -.101 | -.368*** | -.246* | .032 | .852*** | — |  |  |  |  |  |  |
| 9 | DASS-S | 14.79 (6.00) | -.232* | -.143 | -.157 | -.304** | -.259** | -.038 | .848*** | .907*** | — |  |  |  |  |  |
| 10 | IAT | 0.22 (0.51) | .232* | .181 | .252* | .207* | .235* | -.045 | -.496*** | -.468*** | -.49*** | — |  |  |  |  |
| 11 | Flanker Acc | 0.72 (0.24) | .31** | .259* | .143 | .253* | .094 | -.069 | -.682*** | -.756*** | -.69*** | .435*** | — |  |  |  |
| 12 | Flanker RT | 505.64 (231.70) | .213* | .034 | .021 | .189 | .186 | .095 | -.476*** | -.404*** | -.431*** | .272** | .294** | — |  |  |
| 13 | Flanker Acc (diff) | -0.02 (0.316) | .128 | -.037 | -.051 | .139 | .105 | -.088 | -.368*** | -.451*** | -.407*** | .237* | .342*** | .727*** | — |  |
| 14 | Flanker RT (diff) | 33.06 (318.14) | .222* | .136 | .095 | .045 | .088 | -.096 | -.437*** | -.491*** | -.419*** | .195 | .619*** | .159 | .379*** | — |
| *Notes:* IAS = Interoception Awareness Scale; MAIA = Multidimensional Assessment of Interoceptive Awareness– Noticing Subscale; MAIA-g = the “general” factor of the MAIA (see text); RSES = Rosenberg Self-Esteem Scale; FSIS = Flush Self-Image Scale; SWLS = Satisfaction With Life Scale; DASS-D, DASS-A, and DASS-S = Depression Anxiety and Stress Scale and same-named subscales; IAT = *D*-scores of the self-esteem Implicit Association Task; Flanker Overall RT = RT (ms)for the whole task; Flanker Overall Acc = Proportion of correct answers for the whole flanker task; Flanker Diff. RT = Difference of RT (ms) no-flanker blocks from flanker trials in mixed blocks; Flanker Diff. Acc. = Difference of proportion of correct answers on no-flanker blocks from flanker trials in mixed blocks;  aThe average response across six (of eight) subscales on the MAIA (see text)  bThe mean distance from negative attribute to positive attribute on a scale of 0–7;  * *p* < .05; ** *p* < .01; *** *p* < .001. | | | | | | | | | | | | | | | | |
